# Supplementary material for: The investigation of molten ZnCl2 natural particle suspensions
Source: Royal Society of Chemistry journal article supplement (doi:10.1039/c9ay02680k), 2020-01-01
Supplement: c9ay02680k1.pdf [file c9ay02680k1.pdf]

## Supporting Materials for

### **Investigation of molten ZnCl<sub>2</sub> natural particle suspensions**

Xueliang Wang <sup>a,c†\*</sup>, Yiyang Liu <sup>b,c†</sup>, Miao Shen <sup>b</sup>, Xiaobin Fu <sup>b</sup>, Ling Han <sup>b</sup>, Guohong Ma <sup>d</sup>, Hongtao Liu <sup>b\*</sup>, Long  
Yan <sup>a\*</sup>

<sup>a</sup> *Shanghai Institute of Applied Physics, Chinese Academy of Sciences, Shanghai 201800, China*

<sup>b</sup> *Key Laboratory of Interfacial Physics and Technology, Shanghai Institute of Applied Physics, Chinese Academy  
of Sciences, Shanghai 201800, China*

<sup>c</sup> *University of Chinese Academy of Sciences, Beijing 100049, China.*

<sup>d</sup> *Department of physics, Shanghai university, Shanghai 200444, China.*

<sup>†</sup> *These authors contributed equally to this work*

\* correspondence author. E-mail: wangxueliang@sinap.ac.cn; yanlong@sinap.ac.cn; liuhongtao@sinap.ac.cn

#### **Context:**

**PS 1: The infrared (IR) spectroscopy experiments.**

**PS 2: Ultraviolet-Visible (UV-Vis) spectra of natural particle suspensions (NPSs) for Cr and Fe.**

**PS 3: The analysis parameters for ICP-OES.**

## PS 1: The infrared (IR) spectroscopy experiments.

A control sample (sample A) was the cooled  $\text{ZnCl}_2$  which had been melted for 3 h at 470 °C in air. After the UV-Vis spectroscopy experiments for metals at 470 °C, the natural particle suspensions (NPSs) for Cr and Fe were cooled to room-temperature and solidified salt sample containing Cr (sample B) and solidified salt sample containing Fe (sample C) were obtained.

Then, these three kinds of samples were detected by IR spectroscopy (PerkinElmer Frontier). Because  $\text{ZnCl}_2$  is covalent compound with IR spectra vibration absorption peaks and IR spectra obey Beer's-type law [1, 2], it is inevitable that the vibration absorption peaks of trace insoluble substances would be very weak. Therefore, two different strategies were used to increase the signal to noise ratio (SNR) of IR spectra of sample B and sample C:

1. For sample B, the part of salts in the UV-Vis light path was detected, and the IR spectra were collected and accumulated 190 times (collection time: 5min).
2. For sample C, the part of salts (the dark-red floating matter displayed in **Fig. 2c** and **Fig. 2d** in the manuscript) at the salt-gas interface was directly detected by IR spectra.

**Figure S1** shows the IR spectra of these three samples. Curves A, B and C correspond to samples A, B and C, respectively. The IR spectra of three samples at the wave number range of 500-1100  $\text{cm}^{-1}$  are displayed in **Fig. S1a**, which were directly detected (collected and accumulated only 5 times). Those 8 vibration bands, which are detected on all three curves and located at 550, 598, 760, 792, 847, 925, 952 and 960  $\text{cm}^{-1}$ , belong to molten  $\text{ZnCl}_2$ . On curve C in **Fig. S1a**, extra shoulders at wave number near 892, 650, 620 and 545  $\text{cm}^{-1}$  appear. On curve B in **Fig. S1a**, there were no extra shoulders or peaks. **Fig. S1b** displays the IR spectra of sample A and sample B at the wave number range of 565-650  $\text{cm}^{-1}$ , which were collected and accumulated ~190 times (collection time: 5 min). On curve B in **Fig. S1b**, two obvious extra vibration peaks located at 575 and 625  $\text{cm}^{-1}$  appeared.

The extra shoulders on curve C (**Fig. S1a**) suggested the main composition of corrosion products in NPSs for Fe is  $\text{Fe}_2\text{O}_3$  [3, 4]. The extra peaks on curve B (**Fig. S1b**) characterizes the  $\text{Cr}_2\text{O}_3$  phase [5]. Because the element Cr concentration in the NPSs for Cr was less than 150 mg/kg (see **Fig. 5a** in the manuscript), there were no extra shoulders or peaks for chromium compounds

could be observed on the curve B in **Fig. S1a**. When the spectra of sample B were collected and accumulated 190 times (collection time: 5 min), the SNR increased, and then two obvious extra vibration bands located at 575 and 625  $\text{cm}^{-1}$  which characterized the  $\text{Cr}_2\text{O}_3$  phase [5] could be observed.

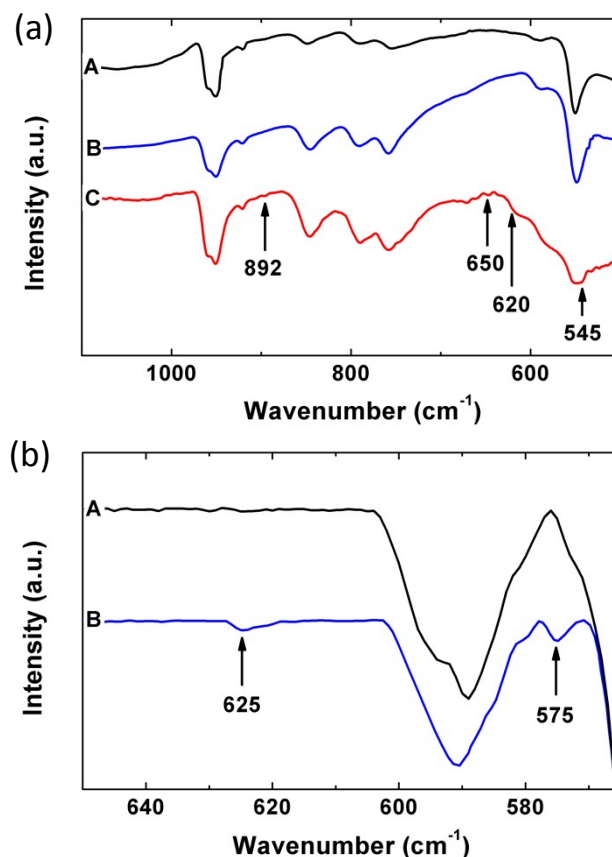

**Fig. S1.** Infrared (IR) spectra of control sample (curve A), solidified salt sample containing Cr (curve B) and solidified salt sample containing Fe (curve C). The IR spectra at wavenumber range of 500-1100  $\text{cm}^{-1}$  are displayed in **(a)** and the IR spectra at wavenumber range of 565-650  $\text{cm}^{-1}$  are displayed in **(b)**. The control sample was the cooled  $\text{ZnCl}_2$  which had been melted for 3 h at 470  $^{\circ}\text{C}$  in air. The solidified salt samples containing Cr and Fe were obtained by cooling the NPSs for Cr and Fe, which formed by the corrosion of metal Cr and Fe in molten  $\text{ZnCl}_2$  for 3 h at 470  $^{\circ}\text{C}$ .

## PS 2: Ultraviolet-Visible (UV-Vis) spectra of natural particle suspensions (NPSs) for Cr and Fe.

**Figure S2** and **Fig. S3** are the UV-Vis spectra of NPSs for Cr and Fe, respectively, which were recorded 105 times and the time interval was 100 s. The axes of UV-Vis spectra have log scaling to exhibit the linearity of the spectra in the higher wavelength range (typically from 400 nm and up). Moreover, these spectra line slopes change only over a relatively small range.

When spectra line slopes change only over a relatively small range, according to Tyndall spectra, the particle radius  $r$  is approximately proportional to the spectra line slope (see equation (4) in manuscript), and based on the Beer's-type law for suspensions,  $Aslope$  can be used to approximately present the change of concentrations of corroded metal elements (see equation (12) in manuscript). Here,  $A$  is the absorbance value of a linear fitting spectrum at the wavelength of 800 nm.

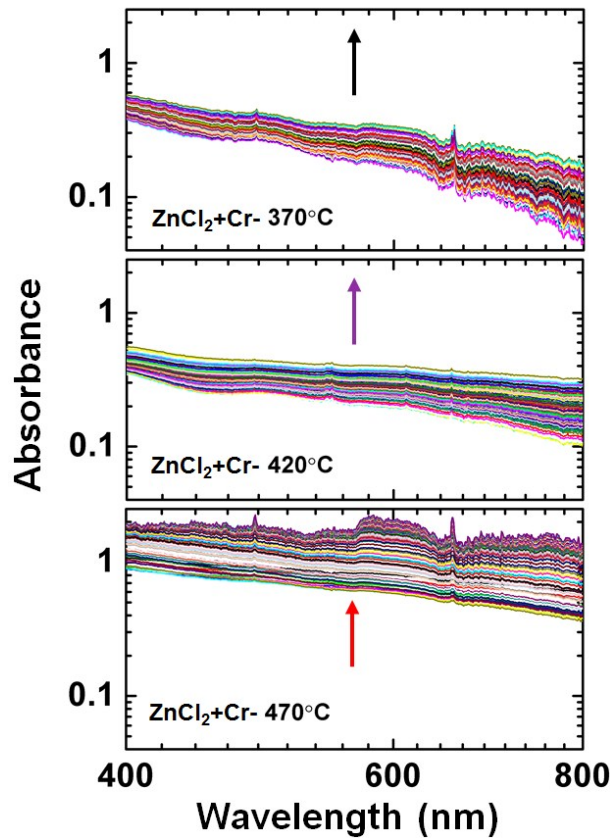

**Fig. S2.** The ultraviolet-visible (UV-Vis) spectra of natural particle suspensions (NPSs) for Cr. The NPSs were produced by the corrosion of metal Cr at 370, 420 and 470 °C in air. These spectra were recorded 105 times and the time interval was 100 s.

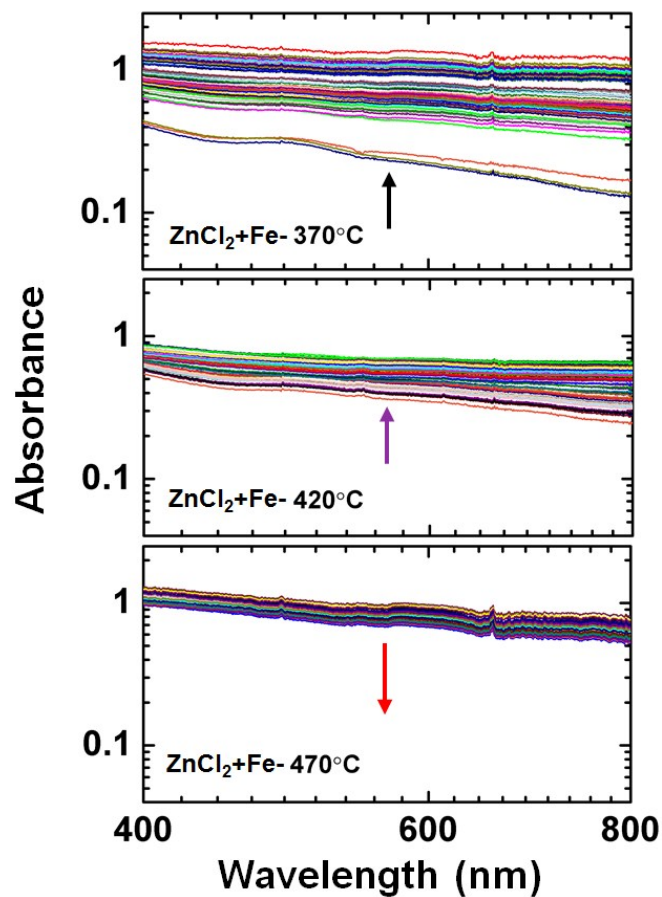

**Fig. S3.** The ultraviolet-visible (UV-Vis) spectra of natural particle suspensions (NPSs) for Fe. The NPSs were produced by the corrosion of metal Fe at 370, 420 and 470 °C in air. These spectra were recorded 105 times and the time interval was 100 s.

### PS 3: The analysis parameters for ICP-OES.

The analysis parameters for ICP-OES are shown in **Table S1**.

Table S1 The analysis parameters for ICP-OES

| Parameter                            | Values                        |
|--------------------------------------|-------------------------------|
| Holographic grating of monochromator | 3600 grooves mm <sup>-1</sup> |
| Resolution                           | 0.008 nm                      |
| Plasma power                         | 1400 W                        |
| Pump speed                           | 30 rpm                        |
| Coolant flow                         | 12 L/min                      |
| Auxiliary flow                       | 1.5 L/min                     |
| Nebulizer flow                       | 1.1 L/min                     |
| Frequency                            | 27.12 MHz                     |
| Wavelength of Cr                     | 267.653 nm                    |
| Wavelength of Fe                     | 238.204 nm                    |

We collected 0.3 g solidified salt near the UV-Vis light path very carefully, grounded it into powder, divided into three equal parts, every part was dissolved in 15 ml nitric acid concentrated (~13 wt. %). The nitric acid solutions were placed in the water bath simultaneously and kept the temperature at 80 °C for 8 hours, then dilute them with deionized to 50 ml.

## References

- [1] Duyckaerts G. The Infra-red Analysis of Solid Substances: A Review. *Analyst* 1959; 84: 201-204. doi: 10.1039/an9598400201.
- [2] Vagenas NV, Gatsouli A, Kontoyannis CG. Quantitative analysis of synthetic calcium carbonate polymorphs using FT-IR spectroscopy. *Talanta* 2003; 59: 831–836. doi:10.1016/S0039-9140(02)00638-0.
- [3] Musić S, Krehula S, Popović S, Skoko Ž. Some factors influencing forced hydrolysis of FeCl<sub>3</sub> solutions. *Mater. Lett.* 2003; 57: 1096–1102. doi:10.1016/S0167-577X(02)00937-0.
- [4] COBLENTZ NO. 4683, NIST Standard Reference Database 69: NIST Chemistry WebBook. <https://webbook.nist.gov/cgi/cbook.cgi?ID=B6004683&Units=SI&Mask=80>.
- [5] COBLENTZ NO. 4699, NIST Standard Reference Database 69: NIST Chemistry WebBook. [https://webbook.nist.gov/cgi/cbook.cgi?Formula=Cr<sub>2</sub>O<sub>3</sub>&NoIon=on&Units=SI&cIR=on](https://webbook.nist.gov/cgi/cbook.cgi?Formula=Cr2O3&NoIon=on&Units=SI&cIR=on).
